# Supplementary material for: An ultra-high ion selective hybrid proton exchange membrane incorporated with zwitterion-decorated graphene oxide for vanadium redox flow batteries
Source: Royal Society of Chemistry journal article supplement (doi:10.1039/c9ta01891c), 2019-01-01
Supplement: c9ta01891c1.pdf [file c9ta01891c1.pdf]

## Electronic Supplementary Information

### Ultra-high ion selectivity hybrid proton exchange membrane incorporated zwitterion-decorated graphene oxide for vanadium redox flow batteries

Yuxia Zhang,<sup>†</sup> Haixia Wang,<sup>†\*</sup> Bo Liu,<sup>†</sup> Jingli Shi,<sup>†</sup> Jun Zhang,<sup>‡</sup> and Haifeng Shi<sup>†\*</sup>

<sup>†</sup> State Key Laboratory of Separation Membranes and Membrane Processes, School of Materials Science and Engineering, Tianjin Polytechnic University, Tianjin 300387, China

<sup>‡</sup> Beijing National Laboratory for Molecular Sciences, CAS Key Laboratory of Engineering Plastics, Institute of Chemistry, Chinese Academy of Sciences, Beijing 100190, China

\* To whom should be corresponded. E-mail: [hxwang@tjpu.edu.cn](mailto:hxwang@tjpu.edu.cn) (H. Wang); [haifeng.shi@gmail.com](mailto:haifeng.shi@gmail.com) (H. Shi)

## Experimental

### Materials

Natural graphite powders (NGP) (325 mesh) were purchased from Qingdao Laixi graphite Co., Ltd. Ethylenediamine was supplied by Tianjin Fengchuan Chemical Reagent Technology Co., Ltd. 1-(3-Dimethylaminopropyl)-3-ethylcarbodiimide hydrochloride (EDC), N-Hydroxysuccinimide (NHS) and 1, 3-propane sultone were obtained from Sigma-Aldrich. Tetrahydrofuran (THF), N, N-dimethyl formamide (DMF) and concentrated sulfuric acid (H<sub>2</sub>SO<sub>4</sub>, 98%) were provide by Tianjin Guangfu fine Chemical Research Institute. Sulfonated poly(ether ether ketone) (SPEEK, Mn=38018) with 59% sulfonated degree was prepared in our lab.

## Characterization

### AFM imaging

AFM imaging measurements were recorded with Dimension Icon (Bruker) under the

tapping mode. For tapping-mode AFM, a commercial Si cantilever (TESP) of about 300 kHz resonant frequency was used.

### *Sulfonic acid uptake*

First, the membrane ( $W_1$ ) is immersed into 3 mol L<sup>-1</sup> H<sub>2</sub>SO<sub>4</sub> solution for 24 h at room temperature, and then it is dried till constant ( $W_2$ ). SU is calculated by equation (1). Subsequently, the SU membrane is blow-washed by water to remove the outside sulfuric acid, and then it is dried to constant ( $W_3$ ). The SU inside membrane (SUI) is calculated by equation (2).

$$SU = \frac{(W_2 - W_1)/M_{H_2SO_4}}{W_1} \quad (1)$$

$$SUI = \frac{(W_3 - W_1)/M_{H_2SO_4}}{W_1} \quad (2)$$

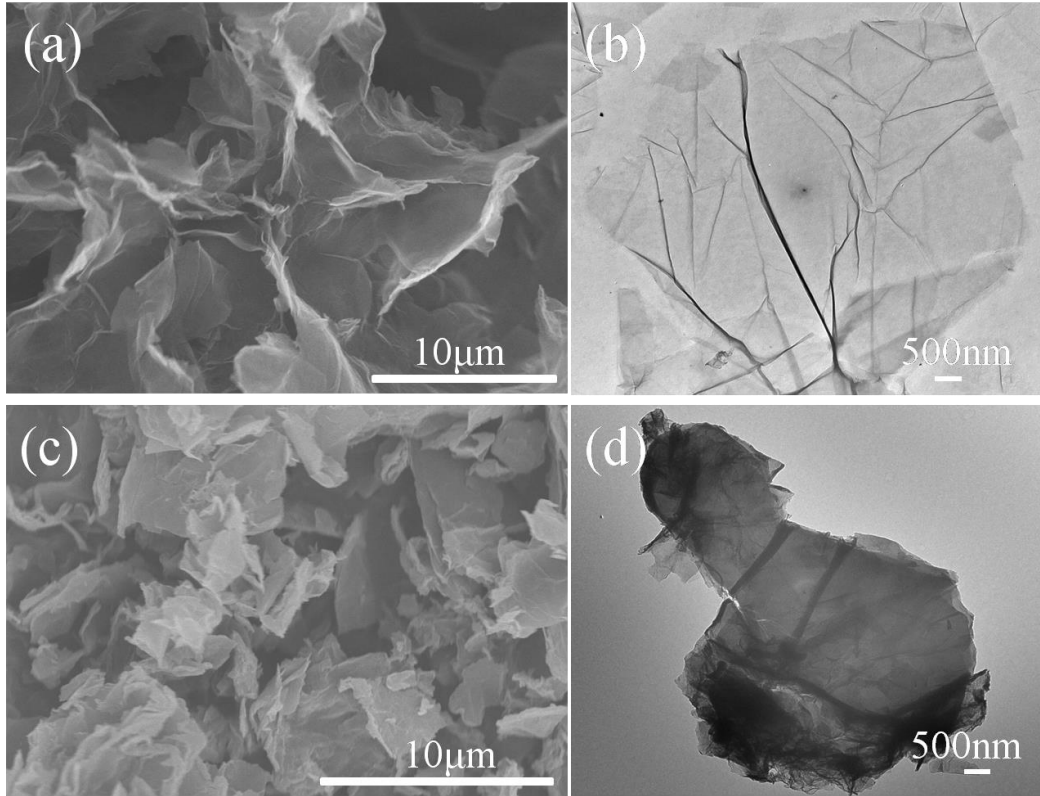

**Fig. S1** SEM and TEM images of GO (a, b) and ZC-GO (c, d).

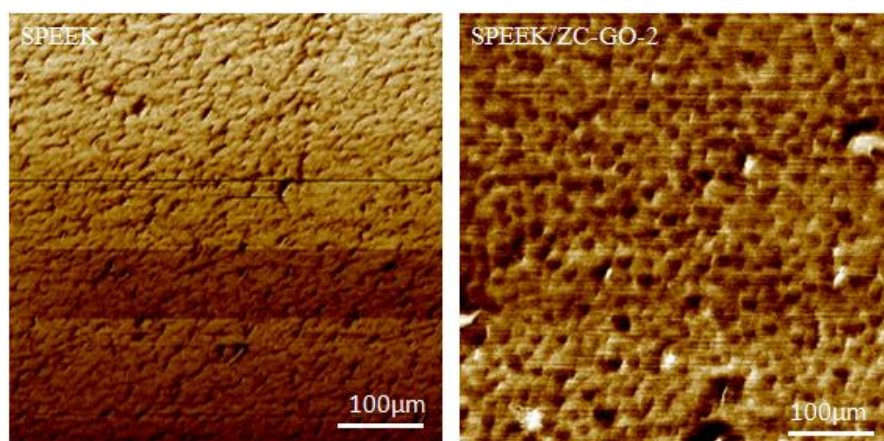

Fig. S2 AFM phase image of SPEEK and SPEEK/ZC-GO-2 membranes.

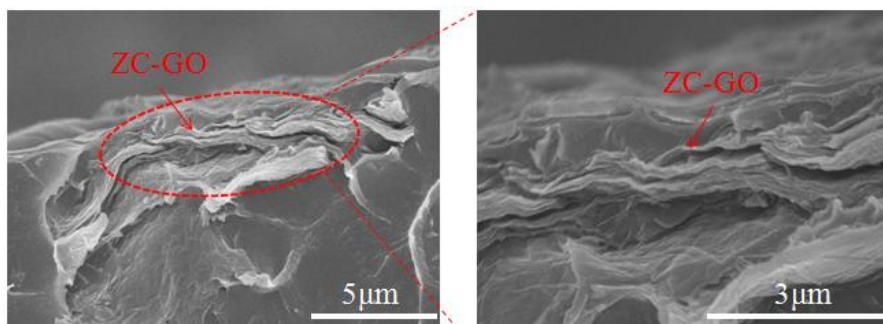

**Fig. S3** Cross-section SEM images of SPEEK/ZC-GO-2 hybrid membrane after DMF vapor corrosion.

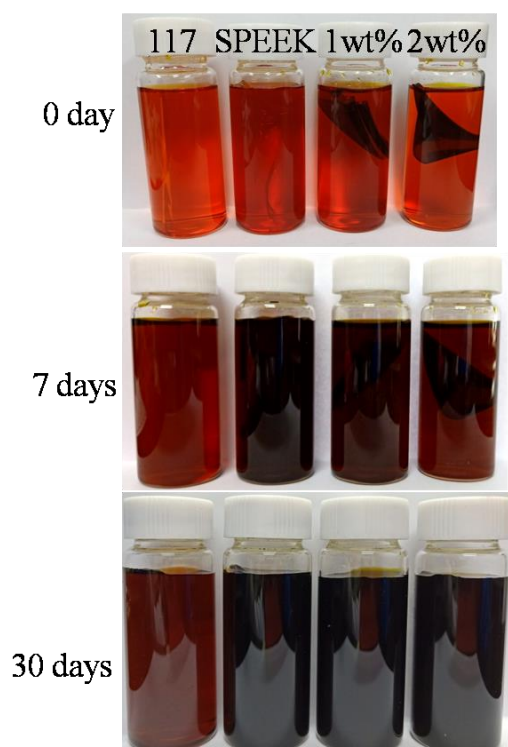

**Fig. S4** Photographs of Nafion 117, SPEEK, SPEEK/ZC-GO-1 and SPEEK/ZC-GO-2 membranes soaked into the solution of  $1.5 \text{ mol L}^{-1} \text{VO}_2^+$  in  $3 \text{ mol L}^{-1} \text{H}_2\text{SO}_4$  in the chemical stability test process.

**Table S1.** The *in-plane* and *through-plane* swelling ratio of SPEEK/ZC-GO hybrid membranes.

| Membranes   | ZC-GO (wt%) | SR <sub><i>in-plane</i></sub> (%) | SR <sub><i>through-plane</i></sub> (%) |
|-------------|-------------|-----------------------------------|----------------------------------------|
|             | 1           | 13.2±0.1                          | 14.9±0.1                               |
| SPEEK/ZC-GO | 2           | 12.7±0.2                          | 14.6±0.1                               |
|             | 3           | 12.2±0.1                          | 14.4±0.1                               |

**Table S2.** Sulfuric acid uptake of SPEEK and SPEEK/ZC-GO membranes.

| Membranes   | ZC-GO (wt%) | SU (mmol g <sup>-1</sup> ) | SUI (mmol g <sup>-1</sup> ) |
|-------------|-------------|----------------------------|-----------------------------|
| SPEEK       | -           | 0.59±0.01                  | 0.09±0.02                   |
|             | 0.5         | 0.77±0.02                  | 0.11±0.01                   |
| SPEEK/ZC-GO | 1           | 0.96±0.02                  | 0.13±0.02                   |
|             | 2           | 1.07±0.03                  | 0.14±0.03                   |
|             | 3           | 1.28±0.01                  | 0.18±0.03                   |
